# Supplementary material for: Link or sink: a modelling interpretation of the open Baltic biogeochemistry
Source: Copernicus journal article supplement (doi:10.5194/bg-1-79-2004), 2004-11-04
Supplement: Supplementary file 1 [file bg-1-79-2004-supplement.pdf]

# **Link or sink: a modelling interpretation of the open Baltic biogeochemistry (additional material)**

M. Vichi<sup>1</sup>, P. Ruardij<sup>2</sup>, and J.W. Baretta<sup>3</sup>

<sup>1</sup>National Institute of Geophysics and Volcanology, Bologna, I

<sup>2</sup>Royal Netherlands Institute of Sea Research, Texel, NL

<sup>3</sup>Noctiluca, Wassenaar, NL

Manuscript submitted to

**Biogeosciences**

October 2004

### **Additional material: Tables and Color Plates**

Description and values of the parameters of ERSEM III used in the presented simulations (cf. Fig. 1 and 2 for the list of state variables).

Symbols refer to the equations detailed in the paper and more in detail in Vichi (2002).

### **References**

Vichi, M.: Predictability studies of coastal marine ecosystem behavior, Ph.D. thesis, University of Oldenburg, Oldenburg, Germany, <http://docserver.bis.uni-oldenburg.de/publikationen/dissertation/2002/vicpre02/vicpre02.html>, 2002.

**Tables**

| <b>Predators</b> | <b>Preys</b> |             |             |             |             |             |             |             |       |
|------------------|--------------|-------------|-------------|-------------|-------------|-------------|-------------|-------------|-------|
|                  | $P_i^{(1)}$  | $P_i^{(2)}$ | $P_i^{(3)}$ | $P_i^{(4)}$ | $Z_i^{(3)}$ | $Z_i^{(4)}$ | $Z_i^{(5)}$ | $Z_i^{(6)}$ | $B_i$ |
| $Z_i^{(3)}$      | 0            | 0           | 0           | 0           | 1.0         | 1.0         | 0           | 0           | 0     |
| $Z_i^{(4)}$      | 1.0          | 0.75        | 0           | 0           | 0           | 1.0         | 1.0         | 0           | 0     |
| $Z_i^{(5)}$      | 0.1          | 1.0         | 0.5         | 0.1         | 0           | 0           | 1.0         | 1.0         | 0.1   |
| $Z_i^{(6)}$      | 0            | 0.2         | 1.0         | 0           | 0           | 0           | 0           | 0.2         | 1.0   |

**Table 1.** Pelagic food matrix  $\delta_{Z,X}$  (non-dimensional).

| <b>Consumers</b> | <b>Food Sources</b> |             |             |             |             |             |             |             |             |             |             |             |
|------------------|---------------------|-------------|-------------|-------------|-------------|-------------|-------------|-------------|-------------|-------------|-------------|-------------|
|                  | $Y_i^{(1)}$         | $Y_i^{(2)}$ | $Y_i^{(3)}$ | $Y_i^{(4)}$ | $Y_i^{(5)}$ | $P_i^{(1)}$ | $P_i^{(2)}$ | $P_i^{(3)}$ | $H_i^{(1)}$ | $H_i^{(2)}$ | $Q_i^{(6)}$ | $R_i^{(6)}$ |
| $Y_i^{(1)}$      | 1.0                 | 0.7         | 1.0         | 0           | 0.5         | 0           | 0           | 0           | 0           | 0           | 0           | 0           |
| $Y_i^{(2)}$      | 0                   | 0           | 0           | 1.0         | 0           | 0           | 0           | 0           | 0           | 0           | 0.1         | 0           |
| $Y_i^{(3)}$      | 0                   | 0           | 0           | 0           | 0           | 1.0         | 1.0         | 1.0         | 1.0         | 0           | 0.1         | 1.0         |
| $Y_i^{(4)}$      | 0                   | 0           | 0           | 1.0         | 0           | 0           | 0           | 0           | 1.0         | 1.0         | 0.3         | 0           |
| $Y_i^{(5)}$      | 0                   | 1.0         | 0           | 0.5         | 1.0         | 0           | 0           | 0           | 0           | 0           | 0           | 0           |

**Table 2.** Benthic food matrix  $\phi_{Y,X}$  ( $d^{-1}$ ).

| <b>Symbol</b>               | $p^{(1)}$                                        | $p^{(2)}$                                        | $p^{(3)}$                                        | $p^{(4)}$                                        | <b>Description</b>                                                                      |
|-----------------------------|--------------------------------------------------|--------------------------------------------------|--------------------------------------------------|--------------------------------------------------|-----------------------------------------------------------------------------------------|
| $r_{0p}$                    | 2.00                                             | 2.50                                             | 5.00                                             | 0.80                                             | Maximum specific growth rate (d <sup>-1</sup> )                                         |
| $Q_{10p}$                   | 2.00                                             | 2.00                                             | 2.00                                             | 2.00                                             | Characteristic Q10 coefficient                                                          |
| $h_{p1}^s$                  | 1.00                                             | -                                                | -                                                | -                                                | Half saturation value for Si-limitation (mmolSi m <sup>-3</sup> )                       |
| $b_p$                       | 0.05                                             | 0.05                                             | 0.05                                             | 0.05                                             | Basal specific respiration rate (d <sup>-1</sup> )                                      |
| $\gamma_p$                  | 0.10                                             | 0.15                                             | 0.20                                             | 0.20                                             | Activity respiration fraction (-)                                                       |
| $\alpha_p$                  | 0.05                                             | 0.20                                             | 0.20                                             | 0.05                                             | Excreted fraction of primary production (-)                                             |
| $h_p^{p,n,s}$               | 0.10                                             | 0.10                                             | 0.10                                             | 0.10                                             | Nutrient stress threshold (-)                                                           |
| $d_{0p}$                    | 0.50                                             | 0.50                                             | 0.25                                             | 0.50                                             | Specific lysis rate (d <sup>-1</sup> )                                                  |
| $\lambda_1$                 | 2.5 10 <sup>-3</sup>                             | 5.0 10 <sup>-3</sup>                             | 2.5 10 <sup>-3</sup>                             | 2.5 10 <sup>-3</sup>                             | Specific affinity for P (mg C <sup>-1</sup> d <sup>-1</sup> )                           |
| $\lambda_3$                 | 2.5 10 <sup>-3</sup>                             | 2.5 10 <sup>-3</sup>                             | 0.0                                              | 2.5 10 <sup>-3</sup>                             | Specific affinity for N-NO <sub>3</sub> (mgC <sup>-1</sup> d <sup>-1</sup> )            |
| $\lambda_4$                 | 2.5 10 <sup>-2</sup>                             | 2.5 10 <sup>-2</sup>                             | 2.5 10 <sup>-2</sup>                             | 2.5 10 <sup>-2</sup>                             | Specific affinity for N-NH <sub>4</sub> (mgC <sup>-1</sup> d <sup>-1</sup> )            |
| $s_{p1}^{\max}$             | 0.03                                             | -                                                | -                                                | -                                                | Standard Si:C ratio in diatoms (mmolSi mg C <sup>-1</sup> )                             |
| $\omega_{p1}^{\text{sink}}$ | 5.0                                              | 0                                                | 0                                                | 5.0                                              | Minimum sedimentation rate (m d <sup>-1</sup> )                                         |
| $l_{p1}^{\text{sink}}$      | 0.70                                             | -                                                | -                                                | 0.75                                             | Nutrient stress threshold for sedimentation (-)                                         |
| $Rr_c^n, Rr_c^p$            | 1.26 10 <sup>-2</sup> ,<br>7.86 10 <sup>-4</sup> | Reference nutrient quota (Redfield, mmolN mgC <sup>-1</sup> , mmolP mgC <sup>-1</sup> ) |
| $n_p^{\min}, p_p^{\min}$    | 0.5Rr_c^n,<br>0.5Rr_c^p                          | 0.5Rr_c^n,<br>0.5Rr_c^p                          | 0.5Rr_c^n,<br>0.5Rr_c^p                          | 0.5Rr_c^n,<br>0.5Rr_c^p                          | Minimum nutrient quota (mmolN mgC <sup>-1</sup> , mmolP mgC <sup>-1</sup> )             |
| $n_p^{\max}, p_p^{\max}$    | 2Rr_c^n,<br>2Rr_c^p                              | 2Rr_c^n,<br>2Rr_c^p                              | 2Rr_c^n,<br>2Rr_c^p                              | 2Rr_c^n,<br>2Rr_c^p                              | Maximum nutrient quota (mmolN mgC <sup>-1</sup> , mmolP mgC <sup>-1</sup> )             |

**Table 3.** Values and description of the phytoplankton parameters used in the reference simulation.

| <b>Symbol</b> | $P^{(1)}$            | $P^{(2)}$           | $P^{(3)}$           | $P^{(4)}$           | <b>Description</b>                                                             |
|---------------|----------------------|---------------------|---------------------|---------------------|--------------------------------------------------------------------------------|
| $b_p$         | 0.10                 | 0.05                | 0.10                | 0.10                | Basal specific respiration rate ( $d^{-1}$ )                                   |
| $\gamma_p$    | 0.10                 | 0.10                | 0.20                | 0.10                | Activity respiration fraction (-)                                              |
| $\alpha_p$    | 0.05                 | 0.10                | 0.10                | 0.15                | Excreted fraction of primary production (-)                                    |
| $\lambda_1$   | $1.25 \cdot 10^{-3}$ | $2.5 \cdot 10^{-3}$ | $2.5 \cdot 10^{-3}$ | $2.5 \cdot 10^{-3}$ | Specific affinity for P ( $mg C^{-1} d^{-1}$ )                                 |
| $\lambda_2$   | $1.25 \cdot 10^{-3}$ | $2.5 \cdot 10^{-3}$ | $2.5 \cdot 10^{-3}$ | $2.5 \cdot 10^{-3}$ | Specific affinity for N ( $mgC^{-1} d^{-1}$ )                                  |
| $h_p^n$       | 1.00                 | 0.50                | 0.10                | 1.00                | Michaelis-Menten constant for $NO_3$ uptake inhibition ( $mmolN-NH_4 m^{-3}$ ) |

**Table 4.** Values and description of the standard phytoplankton parameters modified in run B3.

| <b>Symbol</b>            | <b>B</b>                               | <b>Description</b>                                                       |
|--------------------------|----------------------------------------|--------------------------------------------------------------------------|
| $Q_{10B}$                | 2.95                                   | Characteristic Q10 coefficient                                           |
| $h_B^o$                  | 30.0                                   | Half saturation value for oxygen limitation ( $mmolO_2 m^{-3}$ )         |
| $r_{0B}$                 | 8.38                                   | Potential specific growth rate ( $d^{-1}$ )                              |
| $b_B$                    | 0.01                                   | Basal specific respiration rate ( $d^{-1}$ )                             |
| $\eta_B$                 | 0.30                                   | Assimilation efficiency (-)                                              |
| $\eta_B^o$               | 0.20                                   | Decrease in assimilation efficiency due to anoxia (-)                    |
| $d_{0B}$                 | 0.00                                   | Specific mortality rate ( $d^{-1}$ )                                     |
| $v_B^1$                  | 0.50                                   | Specific potential $R^{(1)}$ uptake ( $d^{-1}$ )                         |
| $v_B^6$                  | 0.10                                   | Specific potential $R^{(6)}$ uptake ( $d^{-1}$ )                         |
| $n_B^{\max}, p_B^{\max}$ | $1.7 \cdot 10^{-2}, 1.9 \cdot 10^{-3}$ | Optimal nutrient quota (Goldman, $mmolN mgC^{-1}, mmolP mgC^{-1}$ )      |
| $h_B^n, h_B^p$           | 0.50, 1.00                             | Half saturation for nutrient uptake ( $mmolN mgC^{-1}, mmolP mgC^{-1}$ ) |

**Table 5.** Parameter values and descriptions for bacterioplankton,  $B_i$ .

| <b>Symbol</b>            | <b>B</b>                               | <b>Description</b>                                                             |
|--------------------------|----------------------------------------|--------------------------------------------------------------------------------|
| $v_B^1$                  | 1.00                                   | Specific potential $R^{(1)}$ uptake ( $d^{-1}$ )                               |
| $v_B^2$                  | 0.25                                   | Specific potential $R^{(2)}$ uptake ( $d^{-1}$ )                               |
| $\lambda_1$              | $5.0 \cdot 10^{-3}$                    | Specific affinity for P ( $mg C^{-1} d^{-1}$ )                                 |
| $\lambda_2$              | $5.0 \cdot 10^{-2}$                    | Specific affinity for N ( $mg C^{-1} d^{-1}$ )                                 |
| $h_B^n$                  | 0.05                                   | Michaelis-Menten constant for $NO_3$ uptake inhibition ( $mmolN-NH_4 m^{-3}$ ) |
| $n_B^{\min}, p_B^{\min}$ | $8.5 \cdot 10^{-3}, 9.5 \cdot 10^{-4}$ | Minimum nutrient quota ( $mmolN mgC^{-1}, mmolP mg C^{-1}$ )                   |

**Table 6.** Values and description of the standard bacterioplankton parameters modified in run B3.

| <b>Symbol</b>                 | <b><math>Z^{(5)}</math></b>              | <b><math>Z^{(6)}</math></b>              | <b>Description</b>                                                      |
|-------------------------------|------------------------------------------|------------------------------------------|-------------------------------------------------------------------------|
| $Q_{10Z}$                     | 2.00                                     | 2.00                                     | Characteristic Q10 coefficient (-)                                      |
| $h_Z^F$                       | 30.0                                     | 100                                      | Michaelis constant for total food ingestion ( $mg C m^{-3}$ )           |
| $\mu_Z$                       | 50.0                                     | 50.0                                     | Feeding threshold ( $mg C m^{-3}$ )                                     |
| $r_{0Z}$                      | 2.00                                     | 10.0                                     | Potential specific growth rate ( $d^{-1}$ )                             |
| $h_Z^o$                       | 0.10                                     | 0.10                                     | Michaelis constant for oxygen dependence (fraction of $O_2$ saturation) |
| $b_Z$                         | 0.02                                     | 0.02                                     | Basal specific respiration rate ( $d^{-1}$ )                            |
| $\eta_Z$                      | 0.50                                     | 0.30                                     | Assimilation efficiency (-)                                             |
| $\alpha_Z$                    | 0.50                                     | 0.50                                     | Excreted fraction of uptake (-)                                         |
| $\epsilon_Z$                  | 0.6                                      | 0.8                                      | Partition between dissolved and particulate excretion (-)               |
| $n_Z^{\max}, p_Z^{\max}$      | $1.26 \cdot 10^{-2}, 7.86 \cdot 10^{-4}$ | $1.26 \cdot 10^{-2}, 7.86 \cdot 10^{-4}$ | Maximum nutrient quota ( $mmolN mgC^{-1}, mmolP mgC^{-1}$ )             |
| $v_Z^n = v_Z^p$               | 1.00                                     | 1.00                                     | Time frequency of the excretion process ( $d^{-1}$ )                    |
| $\zeta_{R1}^n = \zeta_{R1}^p$ | 0.50                                     | 0.50                                     | Preferential recycling for N and P (-)                                  |
| $d_{0Z}$                      | 0.05                                     | 0.05                                     | Specific mortality rate ( $d^{-1}$ )                                    |
| $d_Z^o$                       | 0.25                                     | 0.25                                     | Oxygen-dependent specific mortality rate ( $d^{-1}$ )                   |

**Table 7.** Parameter values and descriptions for microzooplankton and heterotrophic nanoflagellates.

| <b>Symbol</b>            | $Z^{(3)}$                                     | $Z^{(4)}$                                     | <b>Description</b>                                                        |
|--------------------------|-----------------------------------------------|-----------------------------------------------|---------------------------------------------------------------------------|
| $Q_{10z}$                | 3.00                                          | 3.00                                          | Characteristic Q10 coefficient (-)                                        |
| $v_z$                    | 0.016                                         | 0.032                                         | specific search volume ( $\text{m}^3 \text{mg C}^{-1}$ )                  |
| $r_{0z}$                 | 2.00                                          | 2.00                                          | Potential specific growth rate ( $\text{d}^{-1}$ )                        |
| $b_z$                    | 0.01                                          | 0.02                                          | Basal specific respiration rate ( $\text{d}^{-1}$ )                       |
| $\eta_z$                 | 0.70                                          | 0.85                                          | Assimilation efficiency (-)                                               |
| $\alpha_z$               | 0.50                                          | 0.55                                          | Excreted fraction of uptake (-)                                           |
| $d_{0z}$                 | 0.01                                          | 0.02                                          | Specific natural mortality rate ( $\text{d}^{-1}$ )                       |
| $d_z^{dns}$              | 0.02                                          | 0.02                                          | Specific density-dependent mortality ( $\text{d}^{-1}$ )                  |
| $\beta_z$                | 2                                             | 2                                             | Exponent for density dependent mortality (-)                              |
| $n_z^{\max}, p_z^{\max}$ | $1.26 \cdot 10^{-2},$<br>$7.86 \cdot 10^{-4}$ | $1.26 \cdot 10^{-2},$<br>$7.86 \cdot 10^{-4}$ | Maximum nutrient quota ( $\text{mmolN mgC}^{-1}, \text{mmolP mgC}^{-1}$ ) |

**Table 8.** Parameter values and descriptions for carnivorous and omnivorous mesozooplankton.

| <b>Symbol</b>          | <b>Values</b>  | <b>Description</b>                                                                                |
|------------------------|----------------|---------------------------------------------------------------------------------------------------|
| $\Omega_c^o$           | $\frac{1}{12}$ | Unit conversion factor and stoichiometric coefficient (mmolO <sub>2</sub> mgC <sup>-1</sup> )     |
| $\Omega_n^o$           | 2.00           | Stoichiometric coefficient nitrification reaction (mmolO <sub>2</sub> mmolN <sup>-1</sup> )       |
| $\tilde{\Omega}_n^o$   | 1.25           | Stoichiometric coefficient denitrification reaction (mmolO <sub>2</sub> mmolN <sup>-1</sup> )     |
| $\Omega_o^r$           | 0.5            | Stoichiometric coefficient (mmolHS <sup>-</sup> mmolO <sub>2</sub> <sup>-1</sup> )                |
| $\Omega_n^r$           | 0.625          | Stoichiometric coefficient (mmolHS <sup>-</sup> mmolN <sup>-1</sup> )                             |
| $\Lambda_{N4}^{nit}$   | 0.01           | Specific nitrification rate (d <sup>-1</sup> )                                                    |
| $Q_{10N4}$             | 2.37           | Q10 factor for nitrification reaction.                                                            |
| $Q_{10N3}$             | 2.37           | Q10 factor for denitrification reaction.                                                          |
| $h_{N4}^o, h_{N6}^o$   | 10.0           | Half saturation oxygen concentration for chemical processes (mmolO <sub>2</sub> m <sup>-3</sup> ) |
| $\Lambda_{N3}^{denit}$ | 0.35           | Specific denitrification rate (d <sup>-1</sup> )                                                  |
| $\mathcal{M}_o^*$      | 1.00           | Reference anoxic mineralization rate (mmolO <sub>2</sub> m <sup>-3</sup> d <sup>-1</sup> )        |
| $\Lambda_{N6}^{reox}$  | 0.05           | Specific reoxidation rate of reduction equivalents (d <sup>-1</sup> )                             |
| $Q_{10N5}$             | 1.49           | Q10 factor for dissolution of biogenic silica                                                     |
| $\Lambda_{R(6)}^s$     | 0.1            | Specific dissolution rate of biogenic silica (d <sup>-1</sup> )                                   |
| $v_{R6}^{sed}$         | 1.5            | Settling velocity for detritus (m d <sup>-1</sup> )                                               |

**Table 9.** Stoichiometric coefficients and other parameters involving pelagic components.



| <i>Symbol</i> | $H^{(1)}$ | $H^{(2)}$ | <b>Description</b>                                                    |
|---------------|-----------|-----------|-----------------------------------------------------------------------|
| $l_H^n$       | 0.001     | 0.01      | Activity layer thickness where mortality rate is halved (m)           |
| $n_H^{\max}$  | 0.02      | 0.02      | Maximum nutrient quota (mmolN mgC <sup>-1</sup> )                     |
| $p_H^{\max}$  | 0.001     | 0.001     | Maximum nutrient quota (mmolP mgC <sup>-1</sup> )                     |
| $Q_{10H}$     | 2         | 2         | Characteristic Q10 coefficient                                        |
| $r_H^{fast}$  | 0.01      | 0.01      | Specific fractional uptake rate of detritus (d <sup>-1</sup> )        |
| $r_H^{slow}$  | 0.002     | 0.002     | Specific (slow) uptake rate (d <sup>-1</sup> )                        |
| $r_{0H}$      | 8.38      | 8.38      | Specific potential growth rate (d <sup>-1</sup> )                     |
| $\epsilon_H$  | 0.1       | 0.1       | Fraction of uptake excreted as Q1 (-)                                 |
| $r_H^{Q1}$    | 0.05      | 0.05      | Specific uptake rate of DOC (d <sup>-1</sup> )                        |
| $\gamma_H$    | 0.3       | 0.6       | Fraction of uptake respired (-)                                       |
| $b_H$         | 0.02      | 0.02      | Specific rest respiration (d <sup>-1</sup> )                          |
| $h_H^n$       | 0.00      | 0.00      | Half saturation constant for nutrient uptake (mmolN m <sup>-2</sup> ) |
| $h_H^p$       | 0.00      | 0.00      | Half saturation constant for nutrient uptake (mmolP m <sup>-2</sup> ) |
| $\zeta_H$     | 2         | 2         | Preference factor for nutrient content in detritus (-)                |
| $d_{0H}$      | 0.05      | 0.05      | Specific mortality rate (d <sup>-1</sup> )                            |

**Table 10.** Parameter values and descriptions for aerobic and anaerobic bacteria.

| <b>Symbol</b>   | $Y^{(1)}$      | $Y^{(2)}$      | $Y^{(3)}$      | $Y^{(4)}$      | $Y^{(5)}$      | <b>Description</b>                                               |
|-----------------|----------------|----------------|----------------|----------------|----------------|------------------------------------------------------------------|
| $Q_{10Y}$       | 2              | 2              | 2              | 2              | 2              | Characteristic Q10 coefficient                                   |
| $r_{0Y}$        | 0.03           | 0.11           | 0.13           | 0.4            | 0.08           | Potential specific growth rate ( $d^{-1}$ )                      |
| $h_Y^F$         | 2000           | 2000           | 300.00         | 2000           | 2000           | Michaelis-Menten constant for food limitation ( $mgC\ m^{-2}$ )  |
| $\mu_Y$         | 50             | 125            | 50.0           | 50             | 100            | Feeding threshold ( $mg\ C\ m^{-3}$ )                            |
| $\alpha_Y$      | 0.3            | 0.35           | 0.25           | 0.25           | 0.3            | Excreted fraction of uptake (-)                                  |
| $\gamma_Y$      | 0.25           | 0.35           | 0.15           | 0.45           | 0.3            | Respired fraction of uptake (-)                                  |
| $\xi_Y$         | 0.80           | 0.80           | 0.8            | 0.80           | 0.80           | Selectivity for nutrients (-)                                    |
| $b_Y$           | 0.003          | 0.003          | 0.003          | 0.01           | 0.003          | Basal specific respiration rate ( $d^{-1}$ )                     |
| $d_{0Z}$        | 0              | 0              | 0.0025         | 0.01           | 0              | Specific mortality rate ( $d^{-1}$ )                             |
| $D^*$           | 0              | 0.01           | -              | 0.01           | 0.01           | Threshold depth of oxic layer, limiting uptake (m)               |
| $\alpha_{Y,Q6}$ | 0              | 0.8            | 0.70           | 0.4            | 0              | Excreted fraction of detritus uptake (-)                         |
| $m_Y^{max}$     | 0              | 0.2            | 0.001          | 0.03           | 0              | Preferred depth in sediments (m)                                 |
| $m_Y^{min}$     | 0              | 0              | 0              | 0              | 0              | Minimum depth in sediments (m)                                   |
| $n_H^{max}$     | 0.01           | 0.01           | 0.01           | 0.01           | 0.01           | Maximum nutrient quota ( $mmolN\ mgC^{-1}$ )                     |
| $p_H^{max}$     | $7.9\ 10^{-4}$ | $7.9\ 10^{-4}$ | $7.9\ 10^{-4}$ | $7.9\ 10^{-4}$ | $7.9\ 10^{-4}$ | Maximum nutrient quota ( $mmolP\ mgC^{-1}$ )                     |
| $d_w$           | -              | -              | 3.00           | -              | -              | Concentration factor and available water layer for $Y^{(3)}$ (m) |

**Table 11.** Parameter values and descriptions for benthic organisms.

| <b>Symbol</b>          | <b>Value</b>   | <b>Description</b>                                                     |
|------------------------|----------------|------------------------------------------------------------------------|
| $\delta^{tur}$         | 0.02           | Depth scale of bioturbation process (m)                                |
| $\tau_0^{tur}$         | $2.0\ 10^{-6}$ | Physical part of the turbation factor ( $m^2\ d^{-1}$ )                |
| $f_0^{tur}$            | 10.0           | Maximum enhancement factor of detritus penetration by bioturbation (-) |
| $\Psi_{Y^{(1)}}^{tur}$ | 1.00           | $Y^{(1)}$ contribution to bioturbation (-)                             |
| $h^{tur}$              | 10000          | Half-saturation biomass density for bioturbation ( $mg\ C\ m^{-2}$ )   |
| $\Psi_{Y^{(4)}}^{irr}$ | 0.10           | $Y^{(4)}$ contribution to bioirrigation (-)                            |
| $f_0^{irr}$            | 10.0           | Maximum enhancement factor of diffusion by bioirrigation (-)           |
| $h_Y^{irr}$            | 10000          | Half-saturation biomass density for bioirrigation ( $mg\ C\ m^{-2}$ )  |

**Table 12.** Bioturbation and bioirrigation parameters.

| <b>Symbol</b>     | <b>Value</b>          | <b>Description</b>                                                                                           |
|-------------------|-----------------------|--------------------------------------------------------------------------------------------------------------|
| $p_A$             | 3.00                  | Adsorption distribution coefficient for ammonium (-)                                                         |
| $Q_{10A}$         | 2.00                  | Q10 factor for ammonium                                                                                      |
| $D_{0A}$          | $1.022 \cdot 10^{-4}$ | Constant molecular diffusion at 10° C for ammonium ( $m^2 d^{-1}$ )                                          |
| $k_{0A}$          | 3.00                  | Specific nitrification rate ( $d^{-1}$ )                                                                     |
| $h_A^o$           | 10                    | Michaelis-Menten constant for O <sub>2</sub> in pore-waters for nitrification reaction ( $mmol O_2 m^{-3}$ ) |
| $p_N$             | 0                     | Adsorption distribution coefficient for nitrate (-)                                                          |
| $Q_{10N}$         | 2                     | Q10 factor for nitrate                                                                                       |
| $D_{0N}$          | $0.97 \cdot 10^{-4}$  | Constant molecular diffusion at 10° C for nitrate ( $m^2 d^{-1}$ )                                           |
| $d_{0N}$          | 0.35                  | Specific denitrification rate ( $d^{-1}$ )                                                                   |
| $\mathcal{M}_O^*$ | 0.1                   | Reference anoxic mineralisation ( $mmol O_2 m^{-3} d^{-1}$ );                                                |
| $p_S$             | 0                     | Adsorption distribution coefficient for silicate(-)                                                          |
| $Q_{10S}$         | 2                     | Q10 factor for silicate                                                                                      |
| $D_{0S}$          | $0.207 \cdot 10^{-4}$ | Constant molecular diffusion at 10° C for silicate ( $m^2 d^{-1}$ )                                          |
| $s_S$             | 0.08                  | Specific dissolution rate of biogenic silica ( $d^{-1}$ )                                                    |
| $p_Q$             | 0                     | Adsorption distribution coefficient for DOM (-)                                                              |
| $D_{10Q}$         | $0.207 \cdot 10^{-4}$ | Constant molecular diffusion at 10° C for DOM ( $m^2 d^{-1}$ )                                               |
| $p_R$             | 0                     | Adsorption distribution coefficient for reduction equivalents (-)                                            |
| $D_{0R}$          | $0.207 \cdot 10^{-4}$ | Constant molecular diffusion at 10° C for reduction equivalents (HS <sup>-</sup> , $m^2 d^{-1}$ )            |
| $\sigma_R$        | 0.05                  | Specific reoxidation rate of reduction equivalents ( $d^{-1}$ )                                              |
| $p_P^{ae}$        | 400                   | Adsorption coeff. for phosphates in oxic sediments (-)                                                       |
| $p_P^{an}$        | 2                     | Adsorption coeff. for phosphates in anoxic sediments (-)                                                     |
| $D_{0P}$          | $0.383 \cdot 10^{-4}$ | Constant molecular diffusion at 10° C for phosphate ( $m^2 d^{-1}$ )                                         |
| $\theta$          | 1.5                   | Temperature enhancement of oxygen diffusion (-)                                                              |
| $h_{D1}, h_{D2}$  | 0.05                  | Half-value for the layer shifting (m)                                                                        |
| $\sigma$          | 2                     | Exponent for the damping function in layer shifting (-)                                                      |
| $w_{bur}$         | 0.5                   | Burial velocity ( $m d^{-1}$ )                                                                               |
| $\phi$            | 0.4                   | Sediment porosity (-)                                                                                        |

**Table 13.** Sediment dynamics.

## Figure Captions

**Figure 1.** Observed and simulated temperature evolution at the surface (a), in the intermediate layer (b, 40m depth) and at the bottom (c). Bottom panel also shows the results of a sensitivity experiments with a relaxation time scale (RTS) to the climatological salinity profile of 720d.

**Figure 2.** Observed and simulated oxygen saturation at the surface (a) and in the intermediate layer (b). Panel (c) shows the evolution of the dissolved concentration for the simulation with a relaxation time scale for salinity RTS = 90d (continuous line) and RTS = 720d (dashed line). Negative values are indicative of the presence of  $\text{HS}^-$  ions.

**Figure 3.** Observed and simulated nitrate concentration at the surface (a) and in the intermediate (b) and bottom (c) layers. The continuous line is the simulation with the relaxation time scale for salinity RTS = 90d and the dashed line has RTS = 720d.

**Figure 4.** Observed and simulated phosphate concentration at the surface (a) and in the intermediate (b) and bottom (c) layers. The continuous line is the simulation with RTS = 90d and the dashed line has RTS = 720d (only shown for the bottom layer).

**Figure 5.** Observed and simulated silicate concentration at the surface (a) and in the intermediate (b) and bottom (c) layers.

## Figures

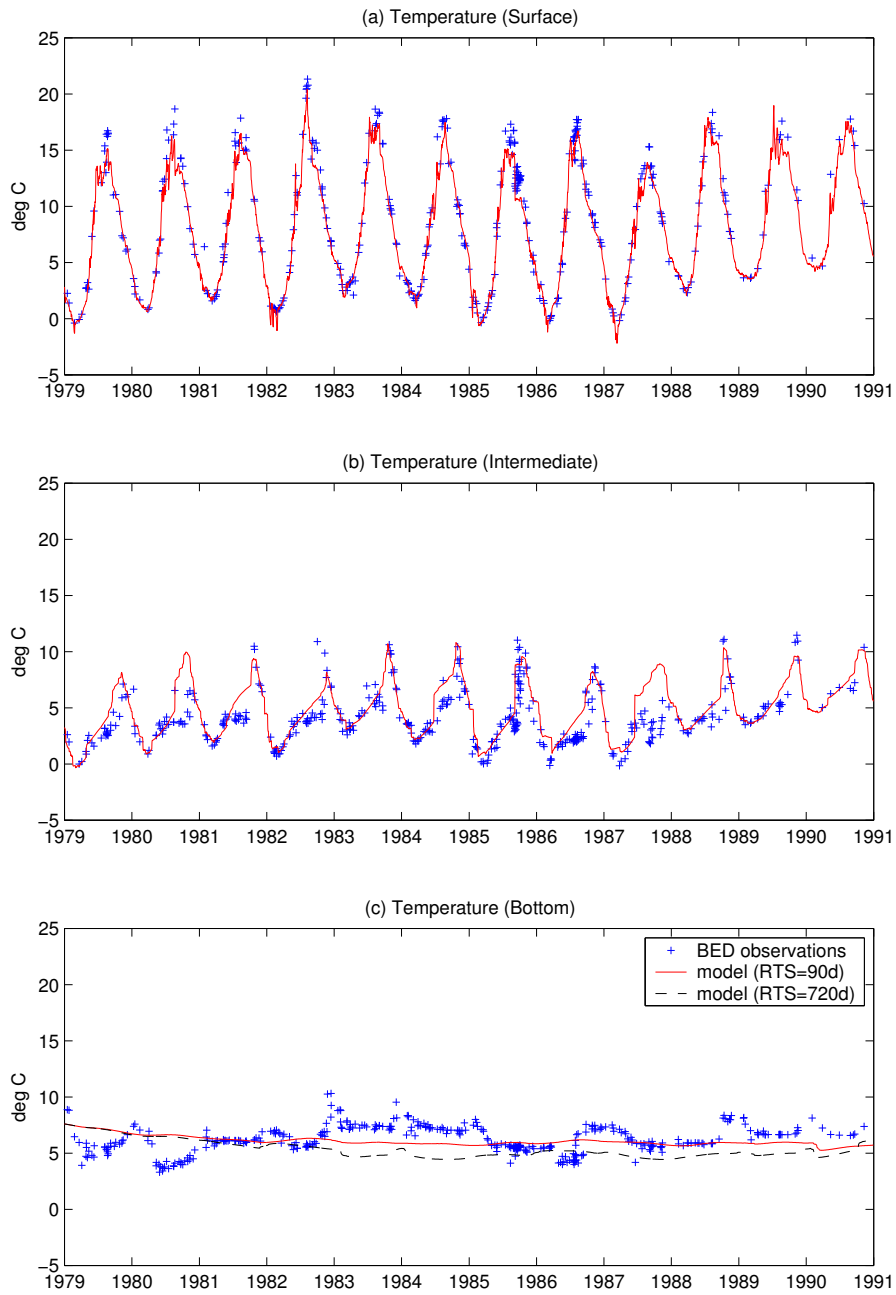

**Figure 1.** Observed and simulated temperature evolution at the surface (a), in the intermediate layer (b, 40m depth) and at the bottom (c). Bottom panel also shows the results of a sensitivity experiments with a relaxation time scale (RTS) to the climatological salinity profile of 720d.

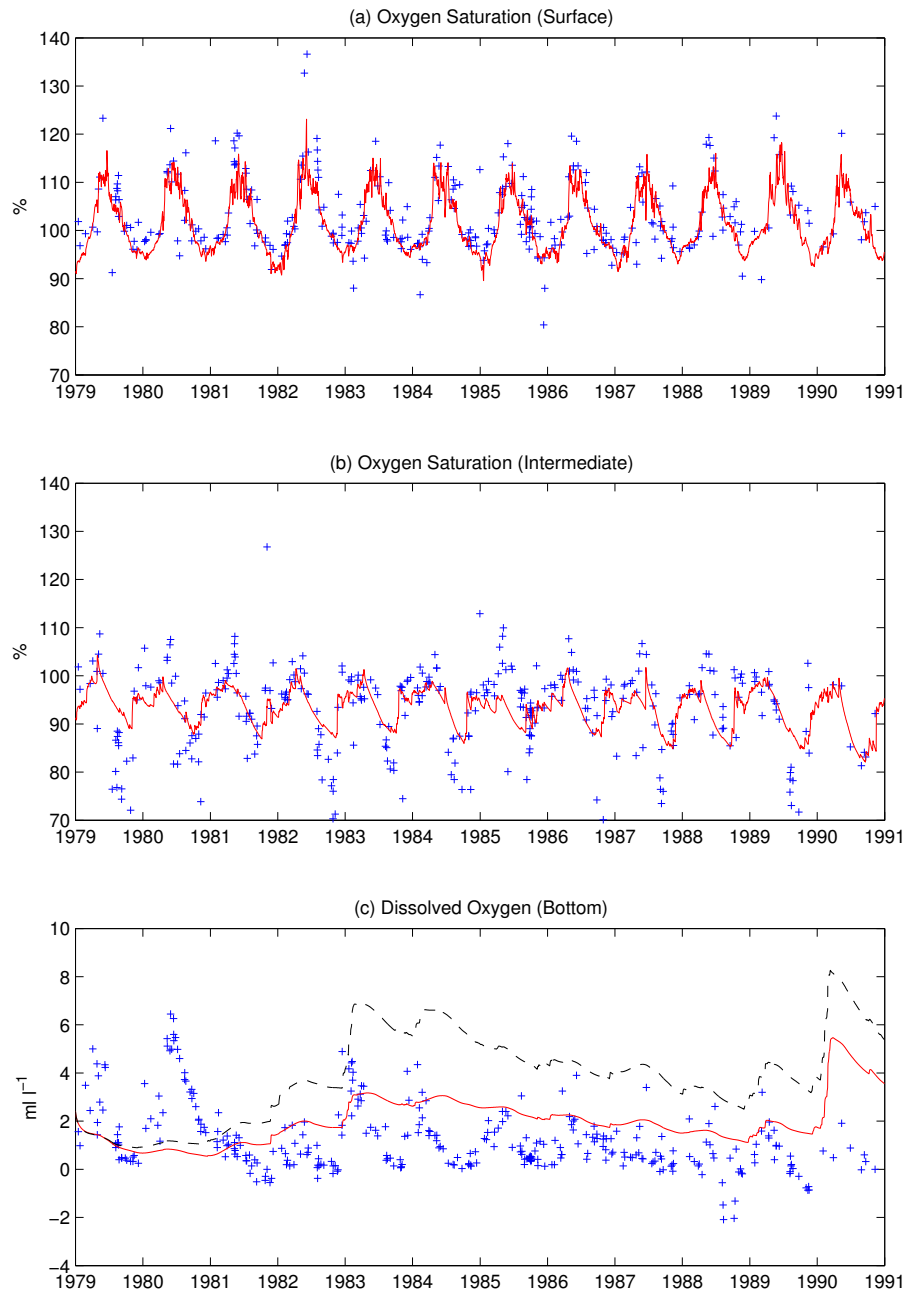

**Figure 2.** Observed and simulated oxygen saturation at the surface (a) and in the intermediate layer (b). Panel (c) shows the evolution of the dissolved concentration for the simulation with a relaxation time scale for salinity  $RTS = 90d$  (continuous line) and  $RTS = 720d$  (dashed line). Negative values are indicative of the presence of  $HS^-$  ions.

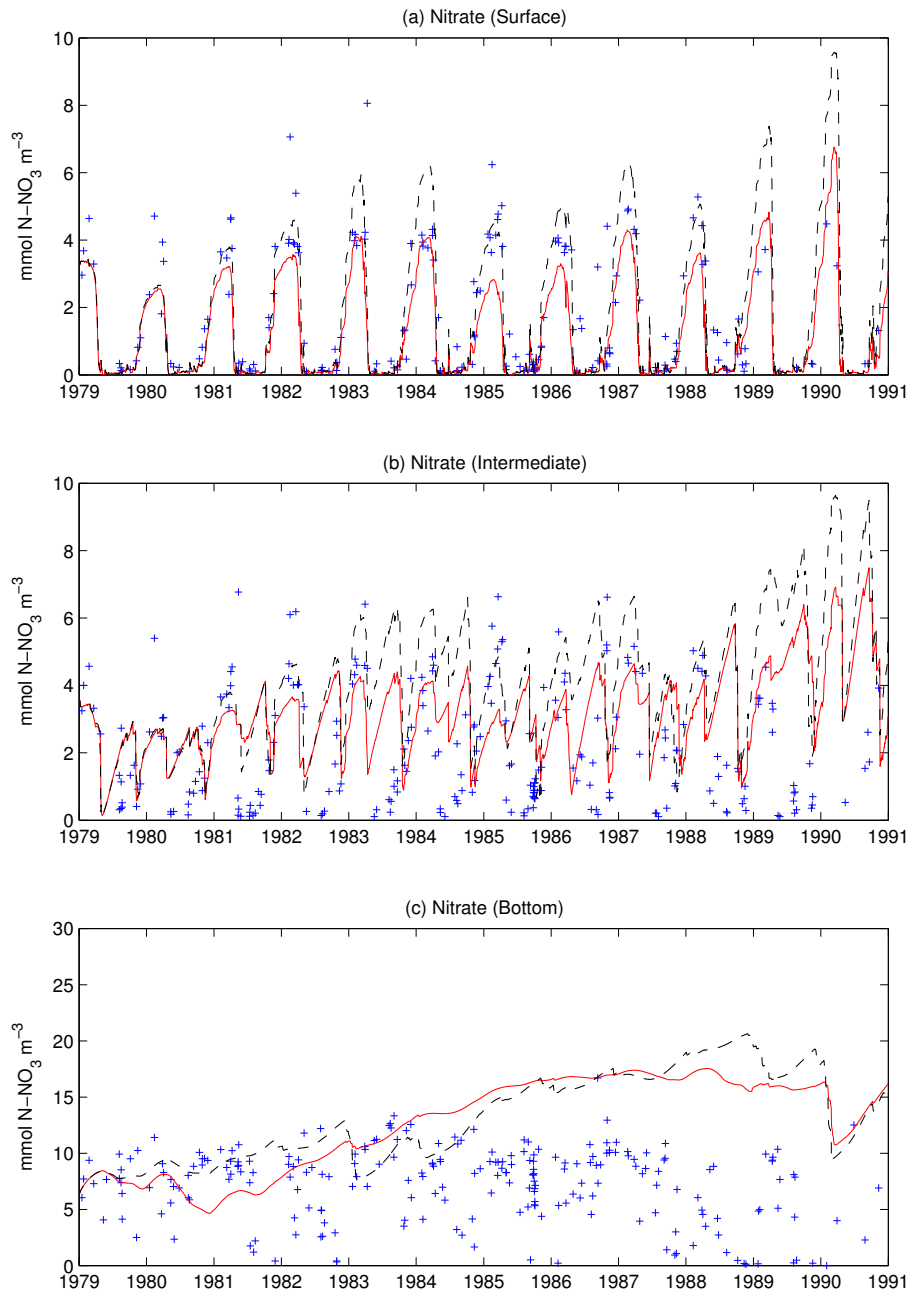

**Figure 3.** Observed and simulated nitrate concentration at the surface (a) and in the intermediate (b) and bottom (c) layers. The continuous line is the simulation with the relaxation time scale for salinity  $RTS = 90d$  and the dashed line has  $RTS = 720d$ .

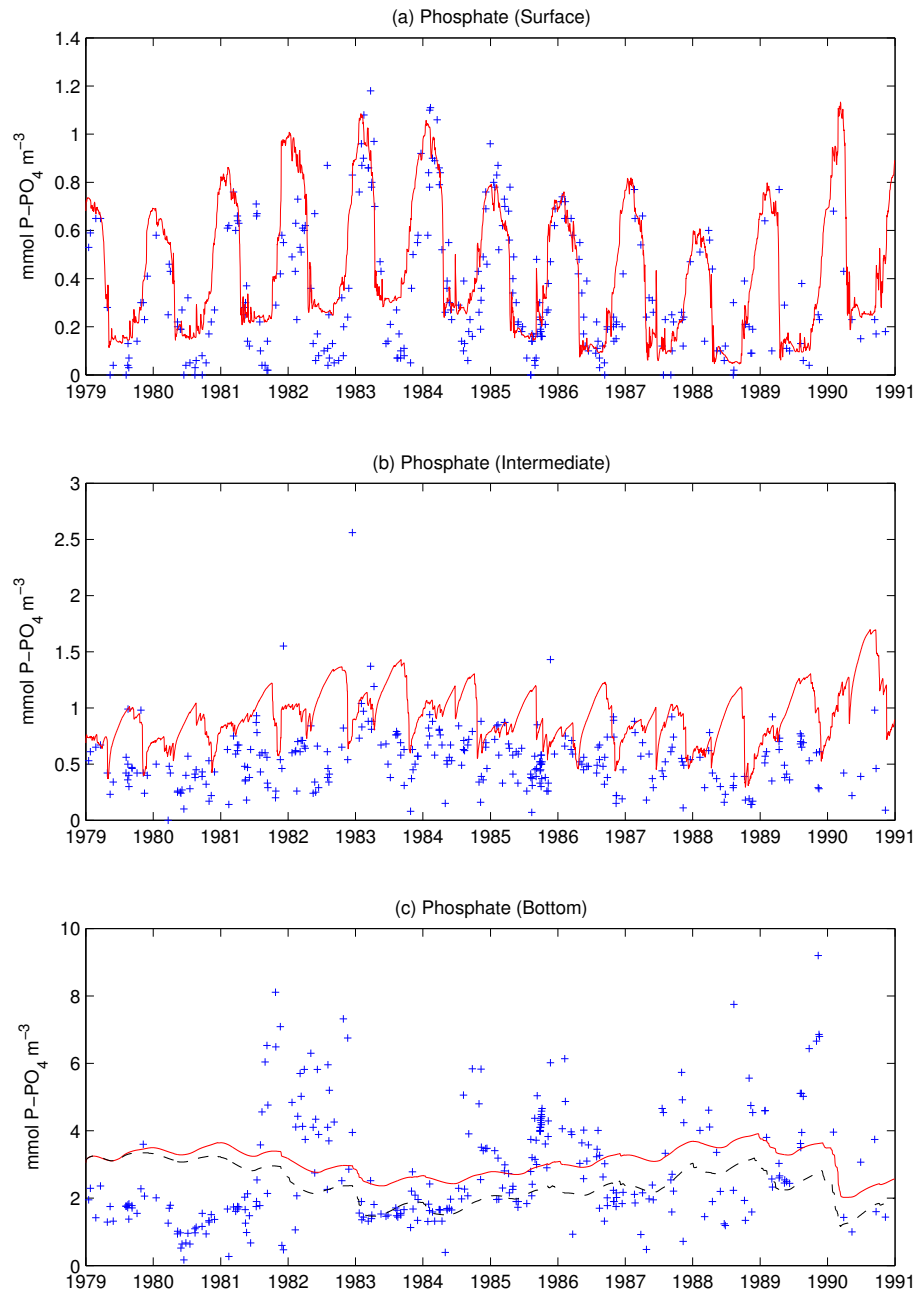

**Figure 4.** Observed and simulated phosphate concentration at the surface (a) and in the intermediate (b) and bottom (c) layers. The continuous line is the simulation with RTS = 90d and the dashed line has RTS = 720d (only shown for the bottom layer).



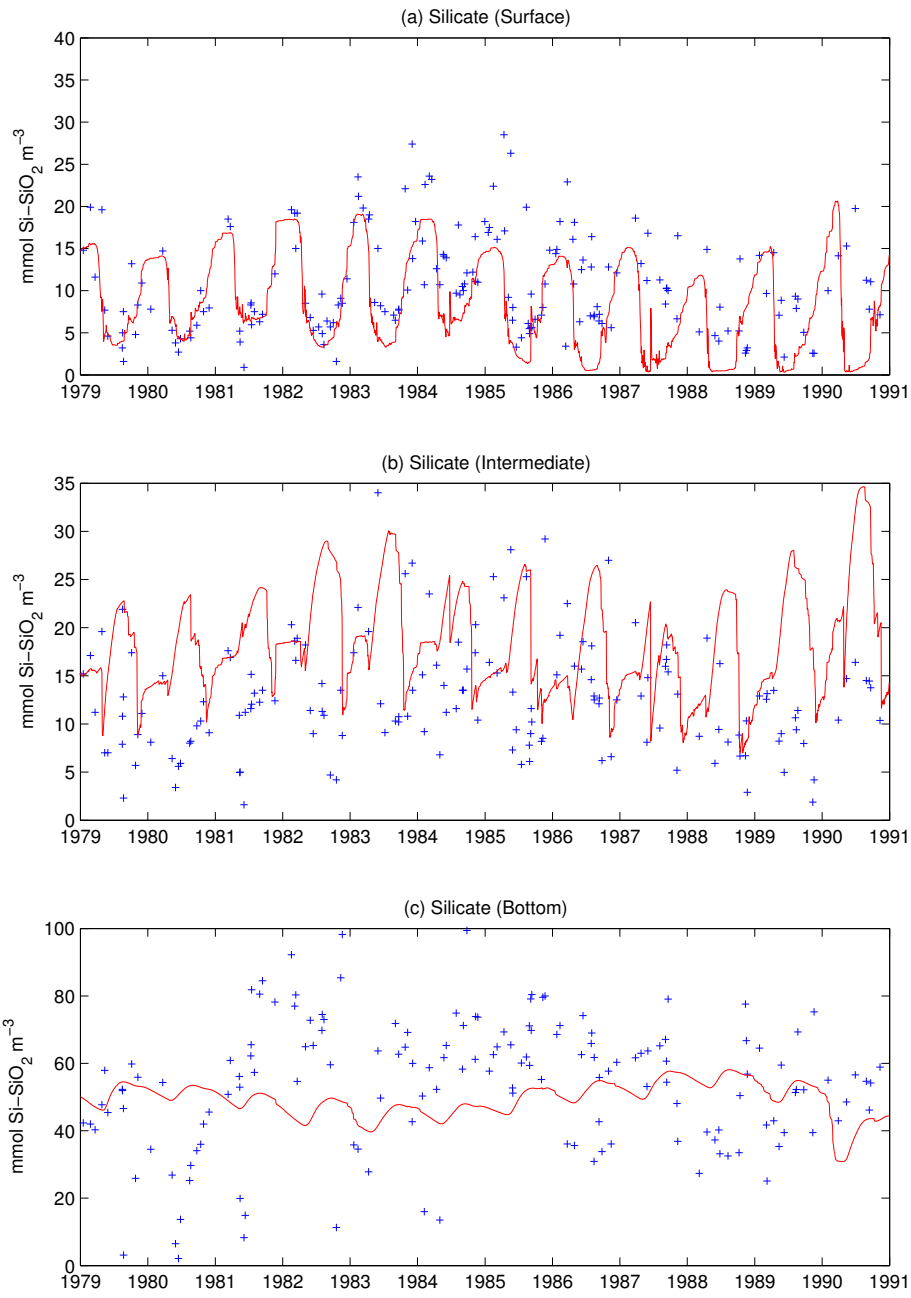

**Figure 5.** Observed and simulated silicate concentration at the surface (a) and in the intermediate (b) and bottom (c) layers.
